# Supplementary material for: Iterative reactions of transient boronic acids enable sequential C–C bond formation
Source: Springer Nature journal article supplement (doi:10.1038/nchem.2439), 2016-02-08
Supplement: 41557_2016_BFnchem2439_MOESM182_ESM.mol [file 41557_2016_BFnchem2439_MOESM182_ESM.mol]

  ChemDraw12171507112D

 21 21  0  0  0  0  0  0  0  0999 V2000
   -0.7120    0.1706    0.0000 C   0  0  0  0  0  0  0  0  0  0  0  0
    0.0025   -0.2424    0.0000 C   0  0  0  0  0  0  0  0  0  0  0  0
   -0.7120    0.9928    0.0000 C   0  0  0  0  0  0  0  0  0  0  0  0
   -0.0448    1.4799    0.0000 O   0  0  0  0  0  0  0  0  0  0  0  0
    0.7169    0.1706    0.0000 C   0  0  0  0  0  0  0  0  0  0  0  0
    1.4314   -0.2424    0.0000 C   0  0  0  0  0  0  0  0  0  0  0  0
    2.1461    0.1697    0.0000 C   0  0  0  0  0  0  0  0  0  0  0  0
   -1.4266   -0.2417    0.0000 C   0  0  0  0  0  0  0  0  0  0  0  0
   -0.7120   -0.6544    0.0000 C   0  0  0  0  0  0  0  0  0  0  0  0
   -2.1409    0.1710    0.0000 C   0  0  0  0  0  0  0  0  0  0  0  0
   -2.8555   -0.2414    0.0000 C   0  0  0  0  0  0  0  0  0  0  0  0
   -3.5699    0.1713    0.0000 C   0  0  0  0  0  0  0  0  0  0  0  0
   -4.2845   -0.2410    0.0000 C   0  0  0  0  0  0  0  0  0  0  0  0
   -3.5697    0.9963    0.0000 C   0  0  0  0  0  0  0  0  0  0  0  0
   -1.4470    1.3703    0.0000 C   0  0  0  0  0  0  0  0  0  0  0  0
    1.4314   -1.0674    0.0000 C   0  0  0  0  0  0  0  0  0  0  0  0
    2.1459   -1.4799    0.0000 C   0  0  0  0  0  0  0  0  0  0  0  0
    2.8603   -1.0674    0.0000 C   0  0  0  0  0  0  0  0  0  0  0  0
    2.8603   -0.2424    0.0000 C   0  0  0  0  0  0  0  0  0  0  0  0
    3.5724   -1.4785    0.0000 O   0  0  0  0  0  0  0  0  0  0  0  0
    4.2845   -1.0674    0.0000 C   0  0  0  0  0  0  0  0  0  0  0  0
  1  2  1  0      
  1  3  1  0      
  3  4  1  0      
  2  5  2  0      
  5  6  1  0      
  6  7  1  0      
  1  8  1  0      
  1  9  1  0      
  8 10  1  0      
 10 11  1  0      
 11 12  2  0      
 12 13  1  0      
 12 14  1  0      
  3 15  1  0      
  6 16  2  0      
 16 17  1  0      
 17 18  2  0      
 18 19  1  0      
 19  7  2  0      
 18 20  1  0      
 20 21  1  0      
M  END
